# Supplementary material for: Efficacy and safety of direct aspiration versus stent-retriever for recanalization in acute cerebral infarction: A PRISMA-compliant systematic review and meta-analysis
Source: PubMed Central journal article supplement — Medicine (Baltimore). 2018 Oct 12;97(41):e12770. doi: 10.1097/MD.0000000000012770 (PMC6203566; doi:10.1097/md.0000000000012770), 2018-10-12

Funnel plot of TIC12b/3

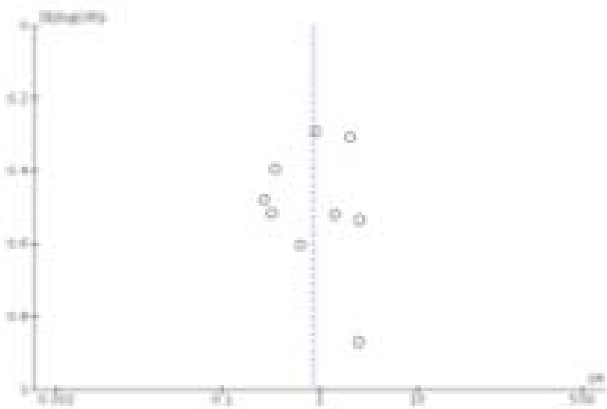

Funnel plot of mRS

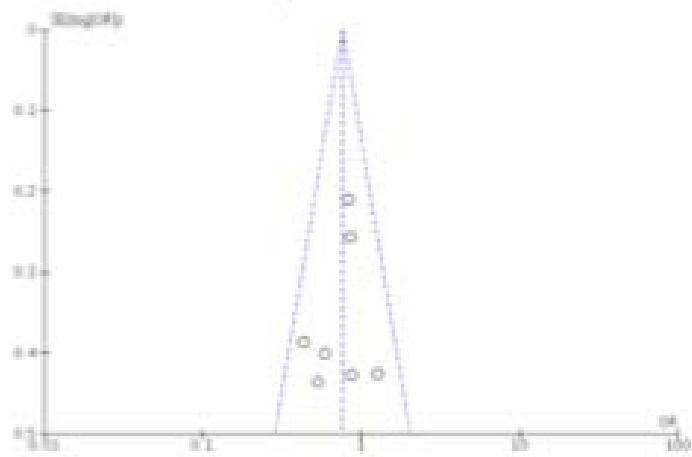

Funnel plot of any ICH

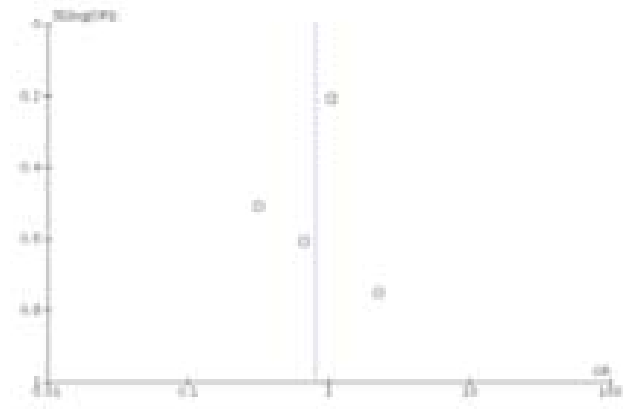

Funnel plot of sICH

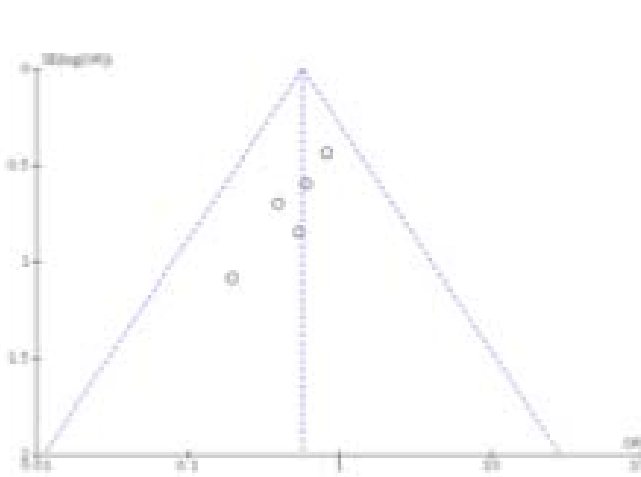

Funnel plot of ENT

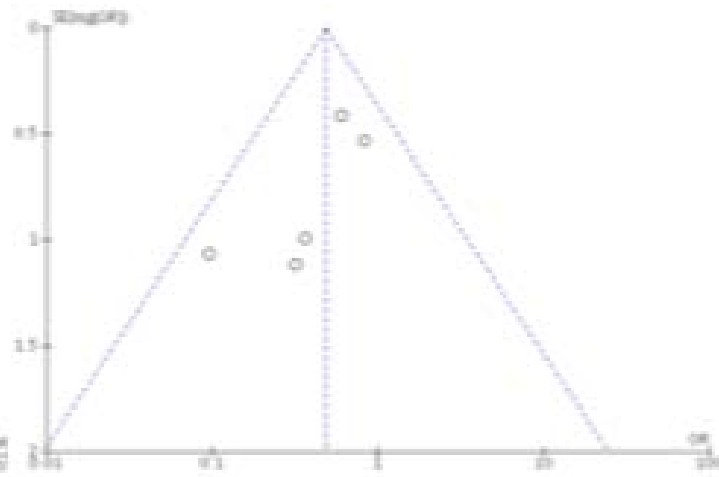

Funnel plot of procedural time

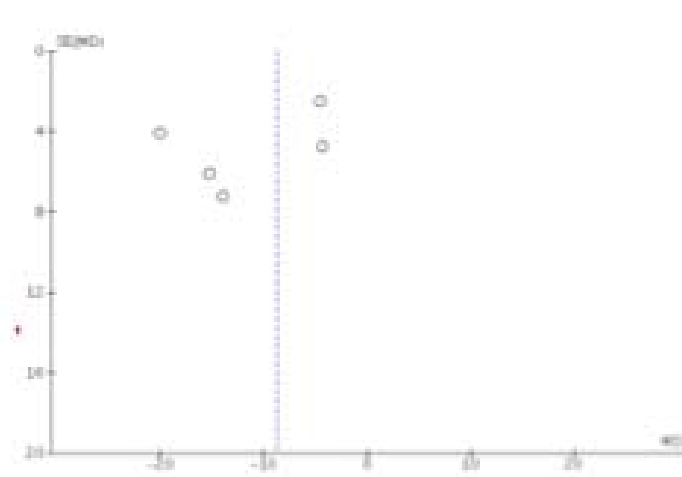

Supplement: medi-97-e12770-s001.pdf [file medi-97-e12770-s001.pdf]
